# Supplementary material for: PLCγ2 regulates TREM2 signalling and integrin-mediated adhesion and migration of human iPSC-derived macrophages
Source: PubMed Central journal article supplement (PMC8494732; doi:10.1038/s41598-021-96144-7), 2021-10-06

## SUPPLEMENTARY MATERIAL

### **PLCy2 regulates TREM2 signalling and integrin-mediated adhesion and migration of human iPSC-derived macrophages**

Juliane Obst<sup>1,\*</sup>, Hazel L. Hall-Roberts<sup>1,2,+</sup>, Thomas B. Smith<sup>1</sup>, Mira Kreuzer<sup>3,§</sup>, Lorenza Magno<sup>4</sup>, Elena Di Daniel<sup>1,#</sup>, John B. Davis<sup>1</sup>, Emma Mead<sup>1</sup>

<sup>1</sup> Alzheimer's Research UK Oxford Drug Discovery Institute, Centre for Medicines Discovery, University of Oxford, Oxford, UK; <sup>2</sup>James Martin Stem Cell Facility, Sir William Dunn School of Pathology, University of Oxford, Oxford, UK; <sup>3</sup>Department of Oncology, MRC Weatherall Institute of Molecular Medicine, University of Oxford, Oxford, UK; <sup>4</sup>UCL Alzheimer's Research UK, Drug Discovery Institute, London, UK; <sup>+</sup> Present address: UK Dementia Research Institute (UK DRI) at Cardiff University, Cardiff, UK, <sup>§</sup>Present address: Institute of Pathology, University of Munich, Munich, Germany, <sup>#</sup>Present address: Astex Pharmaceuticals, Cambridge, UK

(\*) Corresponding author: Juliane Obst. Alzheimer's Research UK Oxford Drug Discovery Institute, Centre for Medicines Discovery, University of Oxford, Oxford, UK. E-mail: juliane.obst@cmd.ox.ac.uk

# Supplementary figure 1:

**A**

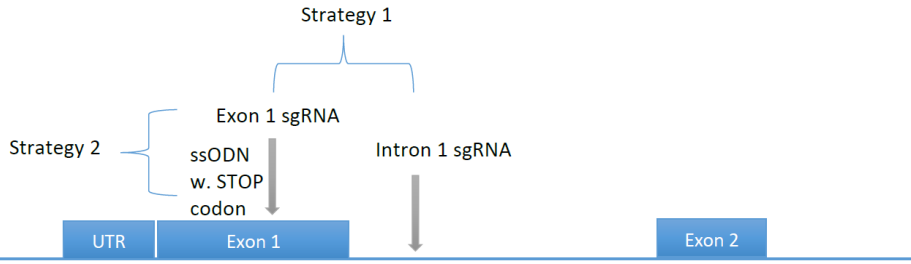

**B**

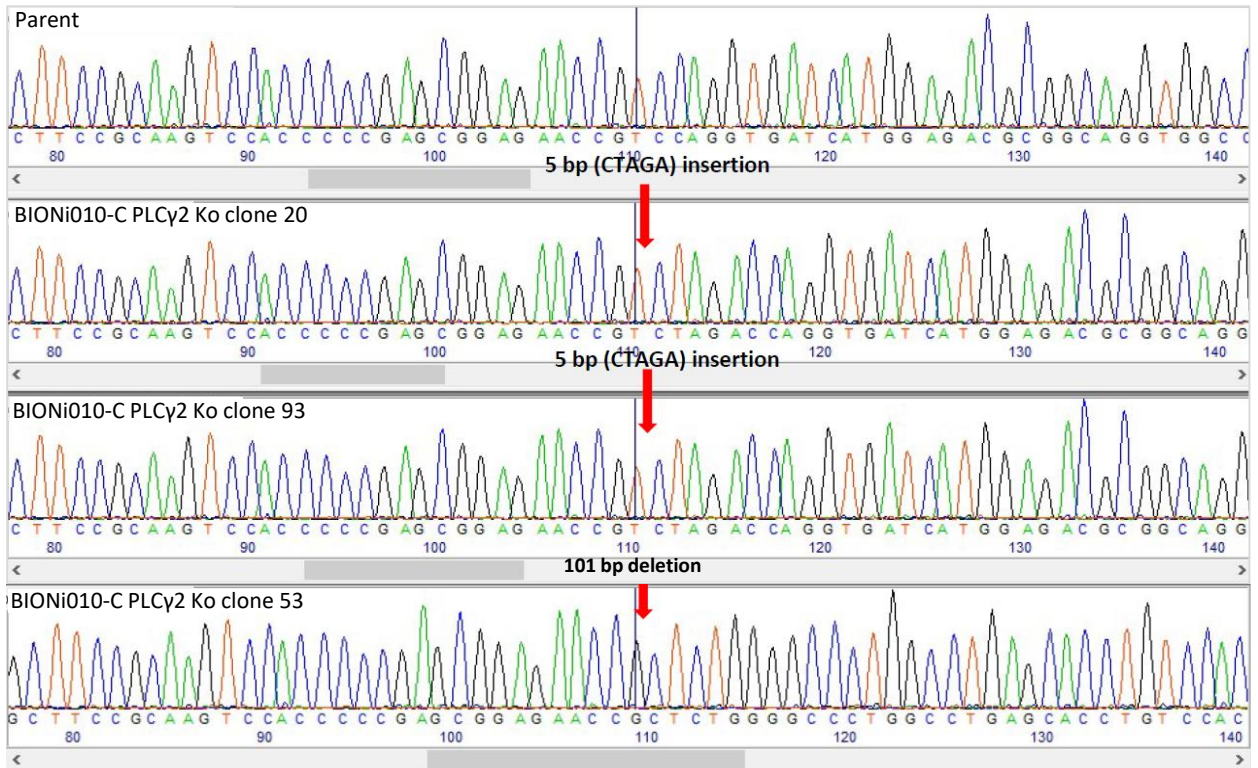

**C**

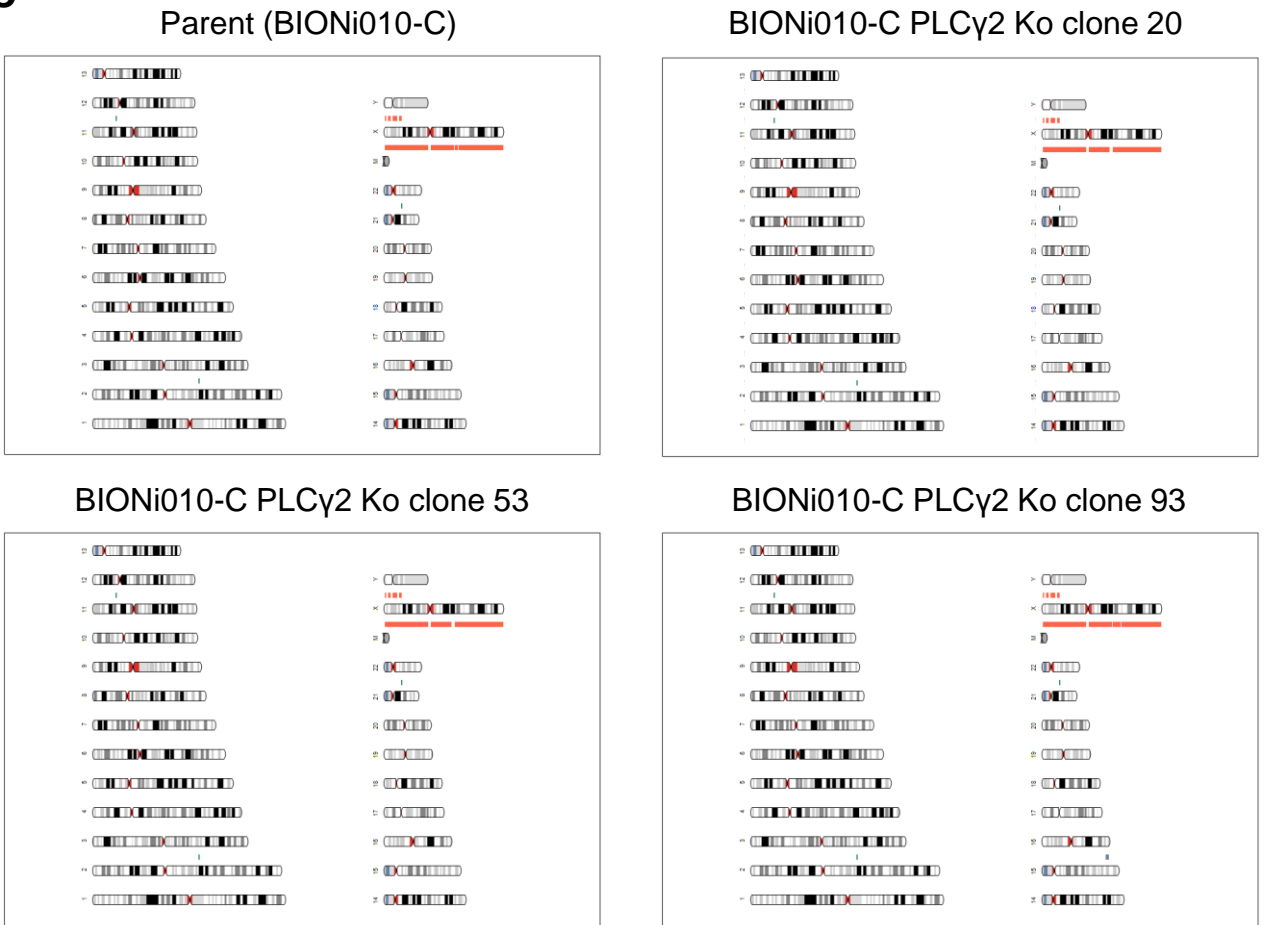

## Supplementary figure 1: Generation of genetically modified iPSC lines.

[A] Two strategies were applied that lead to a premature stop of translation: Exon 1 and Intron 1 sgRNA's were used to cut out the last part of Exon 1 in *PLCG2* or Exon 1 sgRNA and a ssODN was used to insert a STOP codon in Exon 1. [B] Sequencing analysis of PLCy2 Ko clones 20, 53 and 93. The red arrow indicates the site of the CRISPR cutting in the first allele [C] Chromosome karyograms of Parent and PLCy2 Ko clones 20, 53 and 93 from Illumina microarray SNP analysis.

## Supplementary figure 2:

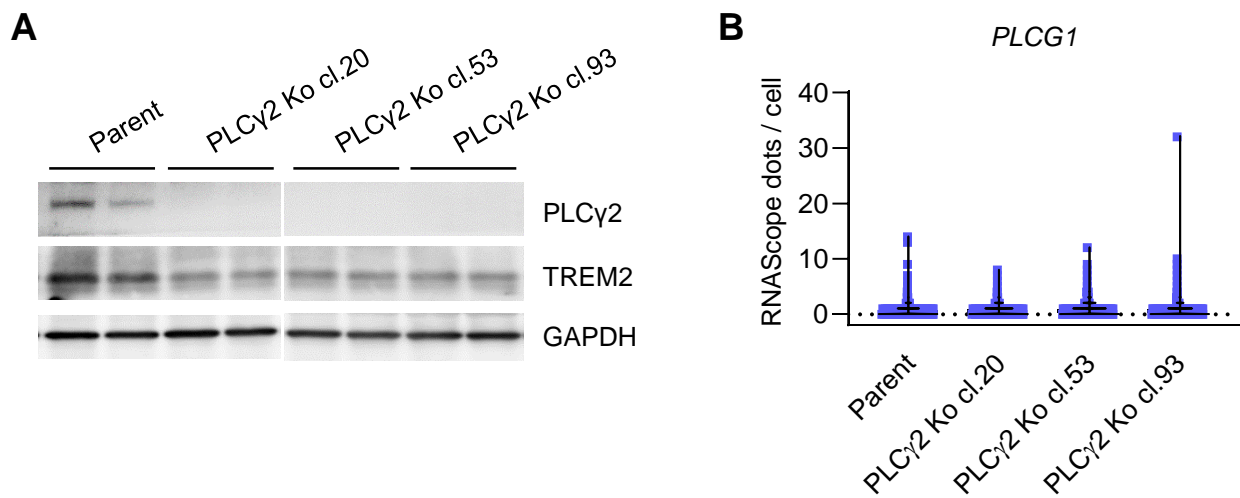

### Supplementary figure 2: Validation of PLCγ2 Ko iPSC macrophages clones 20, 53 and 93.

[A] Levels of total PLCγ2 in Parent line and Ko clones. [B] RNAScope analysis of PLCG1 transcripts in Parent vs. Ko lines.

### Supplementary figure 3:

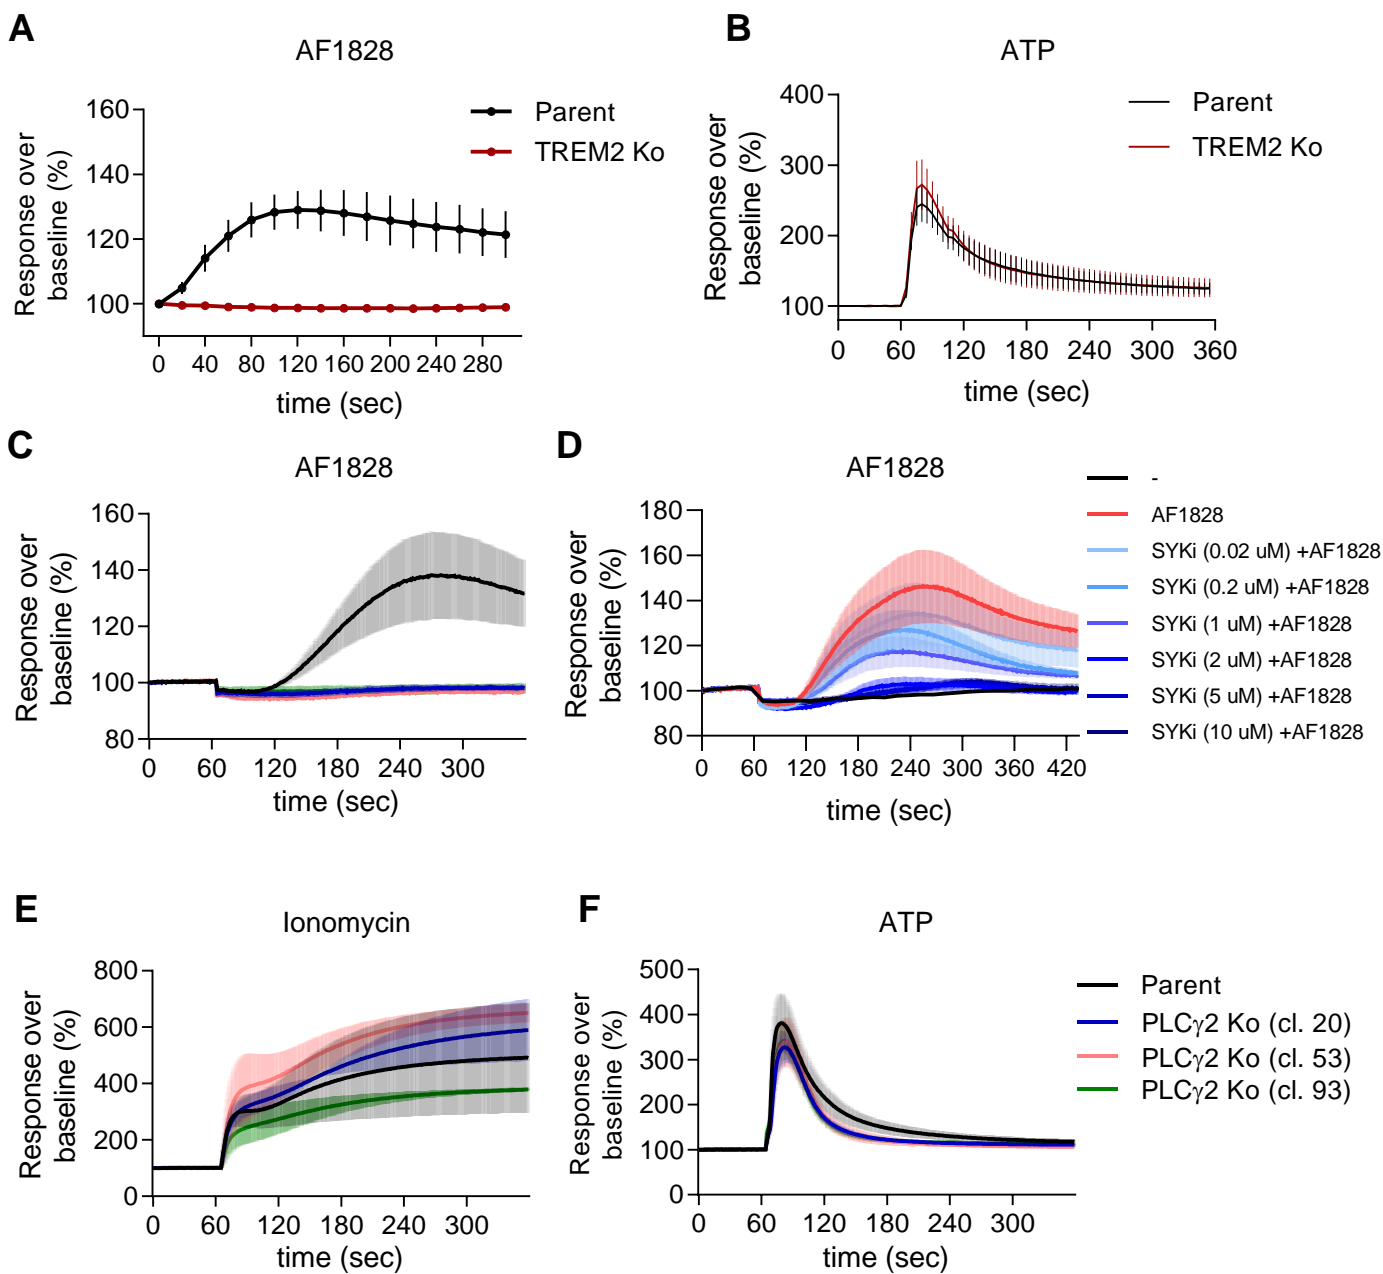

### Supplementary figure 3: Characterisation of the Ca<sup>2+</sup> assay.

[A] Kinetics of calcium response to TREM2 antibody (AF1828, 5 ug/ml) in Parent and TREM2 Ko line. N=4 [B] Kinetics of calcium response to ATP (0.5 mM) in Parent and TREM2 Ko line. N=4 [C] Calcium kinetics upon stimulation with 5 ug/ml TREM2 antibody in Parent and PLCγ2 Ko (clones 20, 53 and 93). N=3 [D] Concentration dependent inhibition of TREM2- induced calcium response using a SYK inhibitor (BIB-057). N=3 [E] Kinetics of calcium response to ionomycin (5 uM) in Parent and PLCγ2 Ko clones. N=2 [F] ATP- induced calcium flux in Parent and PLCγ2 Ko clones. n=4, all data shown represent mean ± SEM.

## Supplementary figure 4:

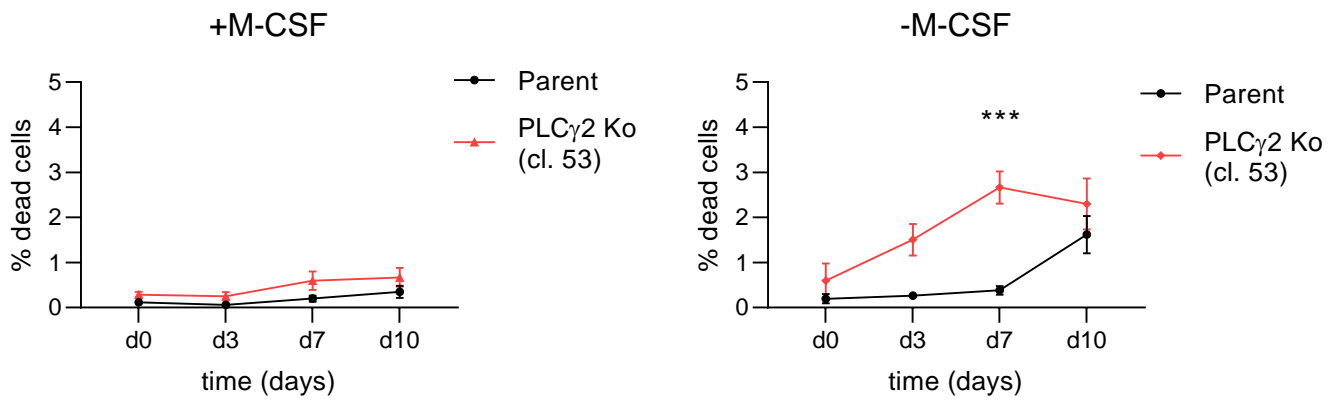

### Supplementary figure 4: Survival analysis of PLCγ2 Ko clone 53 in the presence or absence of M-CSF.

Cell death under normal culture conditions (+M-CSF) after  $\geq 7$  days in the PLCγ2 Ko clone 53 compared to the Parent. In the absence of M-CSF (-M-CSF), PLCγ2 Ko clone 53 showed enhanced sensitivity to cell death than the Parent line.  $n = 3$ , all data shown represent mean  $\pm$  SEM. two-way ANOVA followed by Bonferroni's multiple comparison test. \*  $p < 0.05$ , \*\*  $p < 0.01$ , \*\*\*  $p < 0.001$

## Supplementary figure 5:

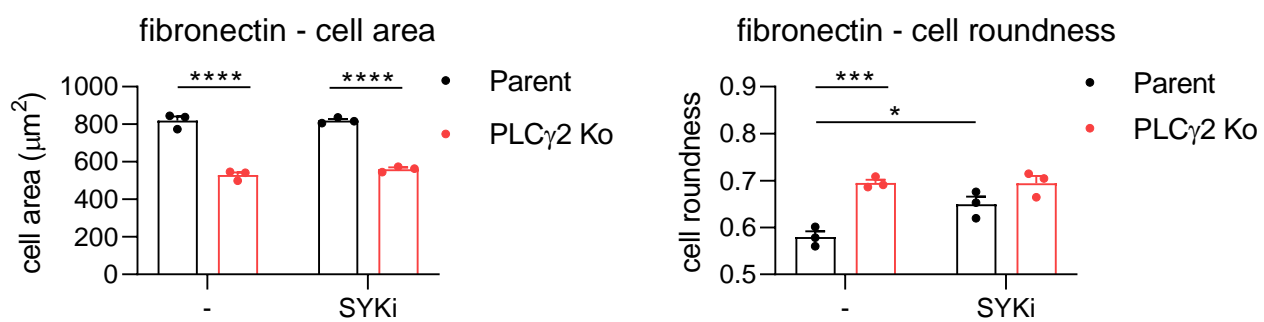

### Supplementary figure 5: Effect of PLCγ2 Ko on cell spreading on fibronectin.

Fibronectin coating does not rescue cell area or cell roundness in PLCγ2 Ko cells. N=3, all data shown represent mean ± SEM. two-way ANOVA followed by Bonferroni's multiple comparison test. \* p < 0.05, \*\* p < 0.01, \*\*\* p < 0.001

## Supplementary figure 6:

This figure shows the full original uncropped Western blot images of Figure 1A (results)

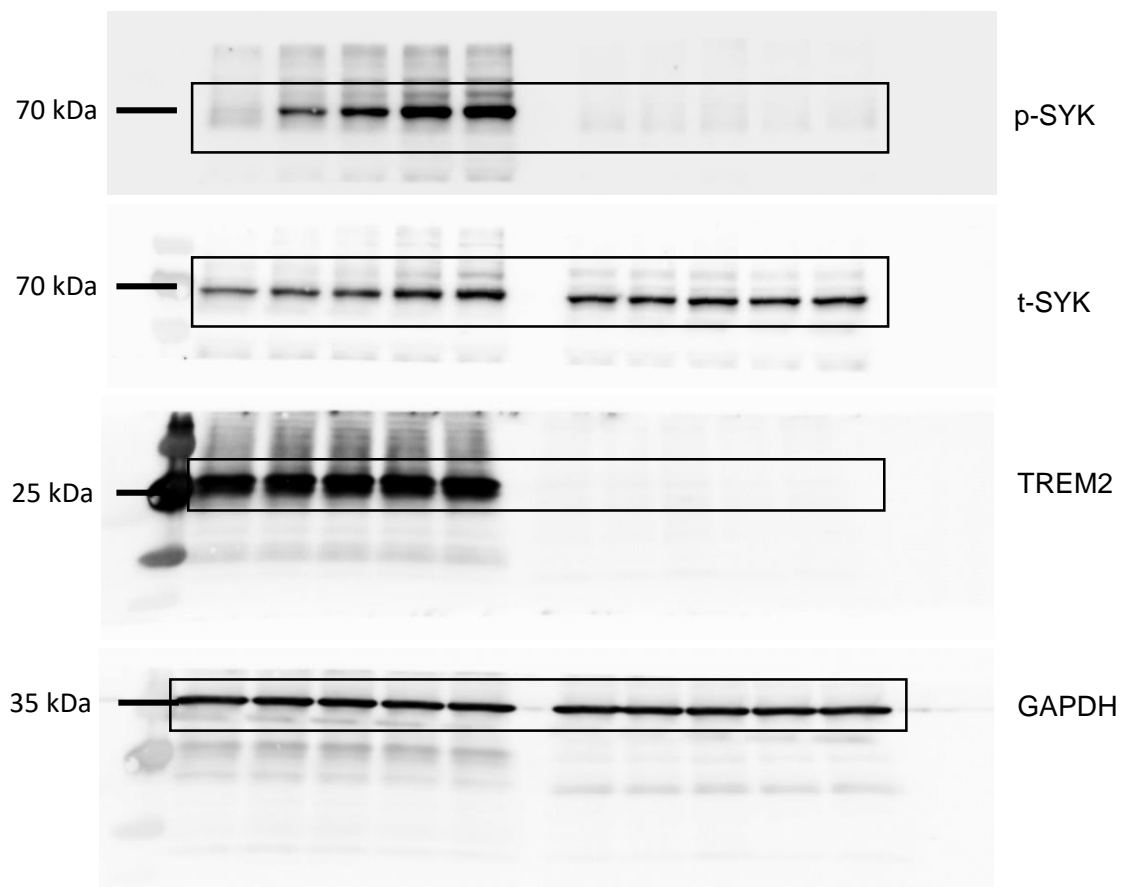

## Supplementary figure 7:

This figure shows the full original uncropped Western blot images of Figure 2A (results)

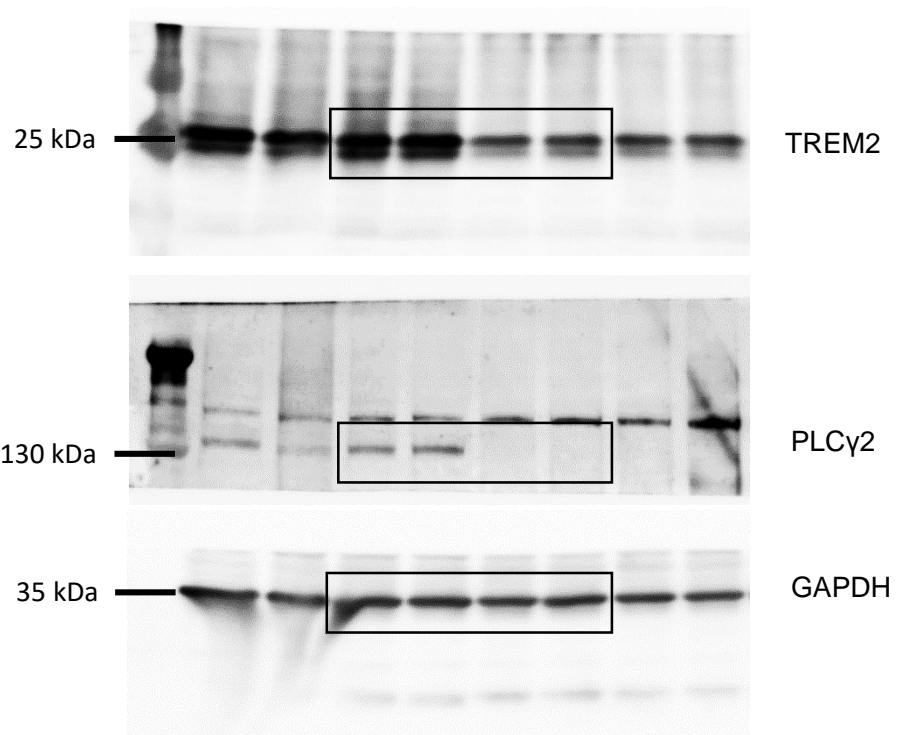



## Supplementary figure 8:

This figure shows the full original uncropped Western blot images of Suppl. Figure 2

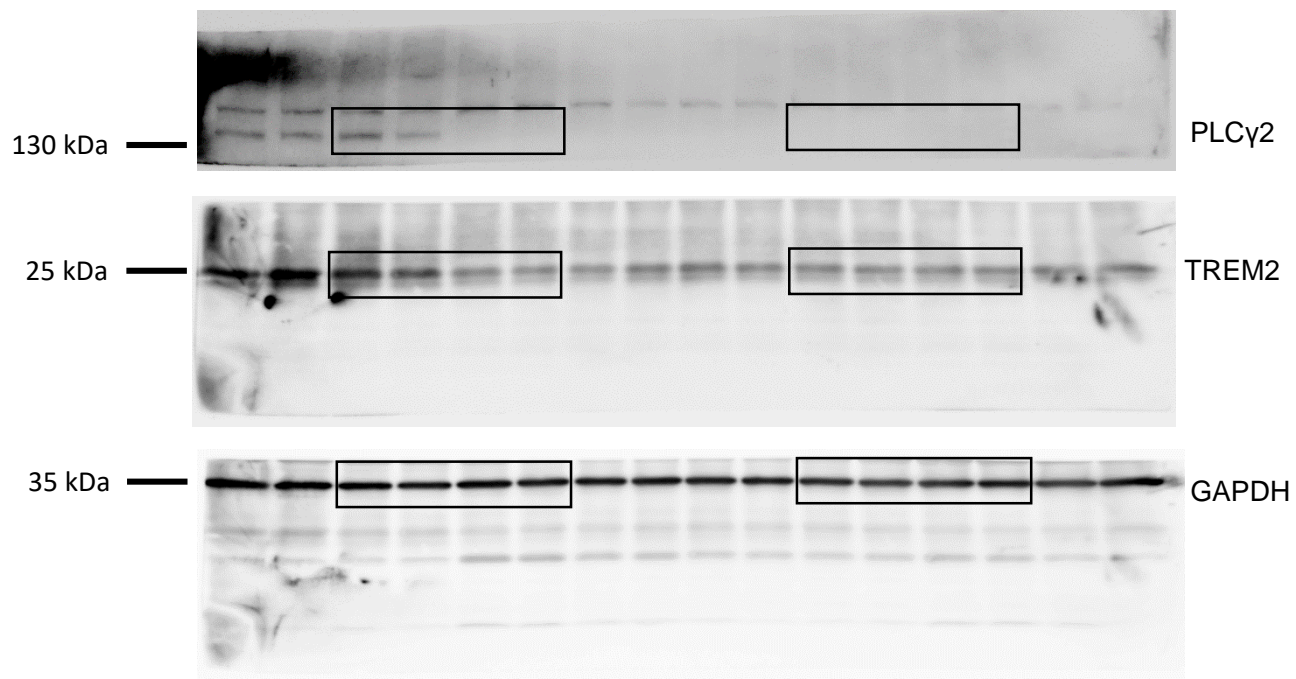

## Supplementary figure 9:

This figure shows the full original uncropped Western blot images of Figure 3A (results)

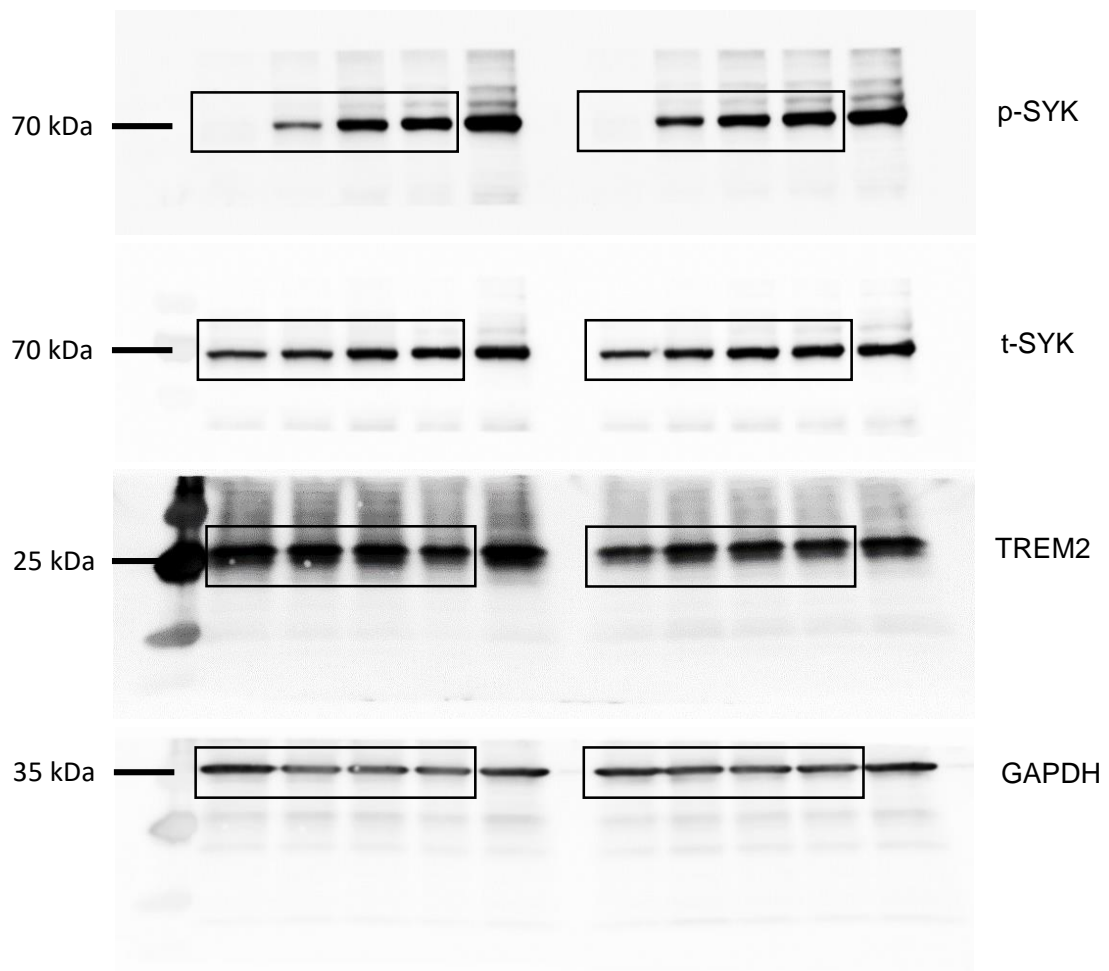

## Supplementary figure 10:

This figure shows the full original uncropped Western blot images of Figure 3F (results)

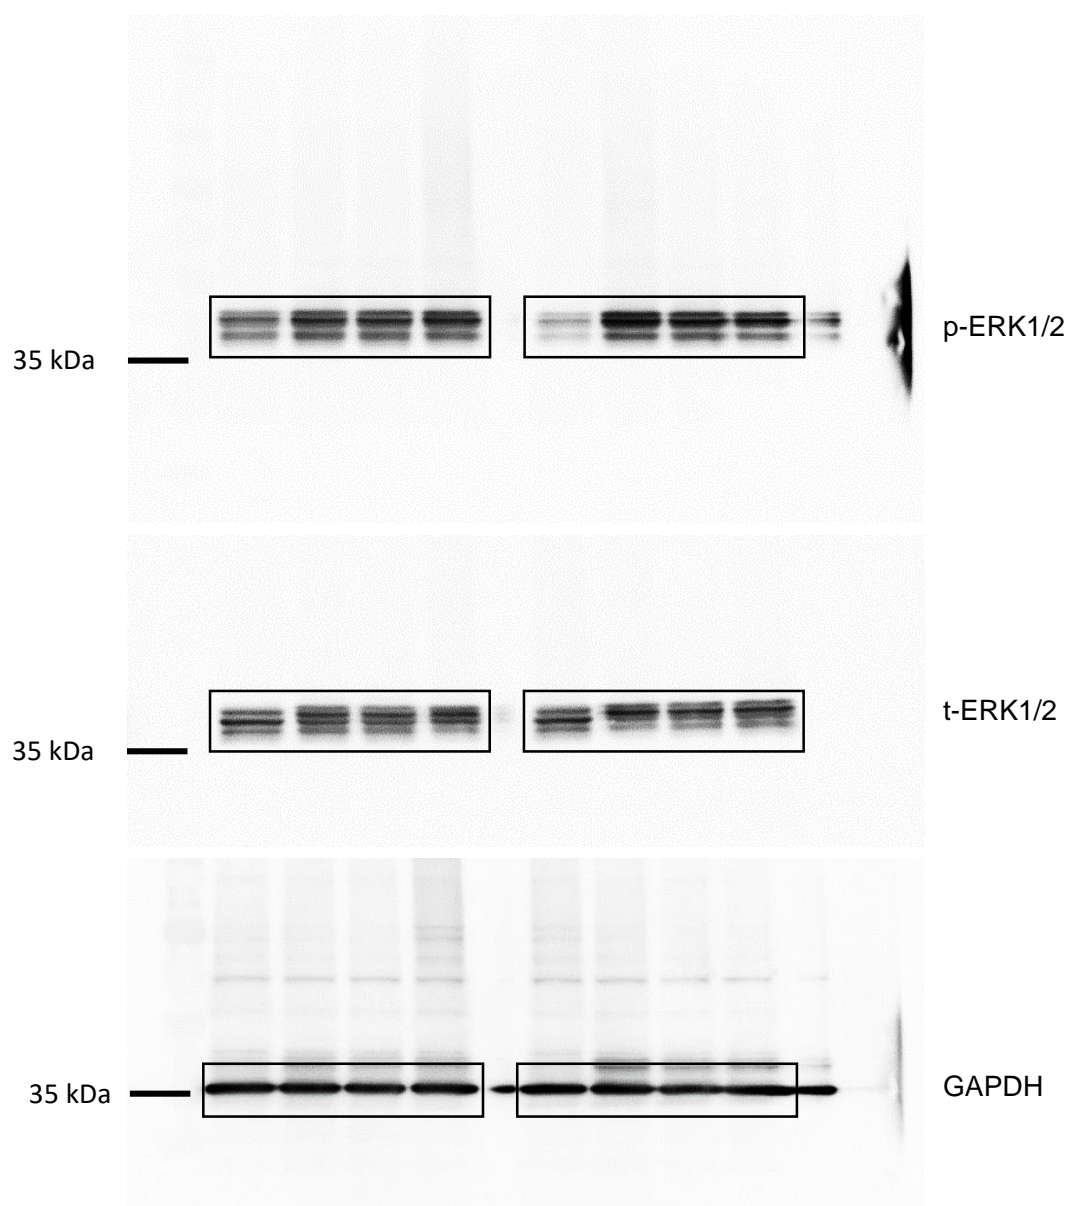

## Supplementary figure 11:

This figure shows the full original uncropped Western blot images of Figure 5E (results)

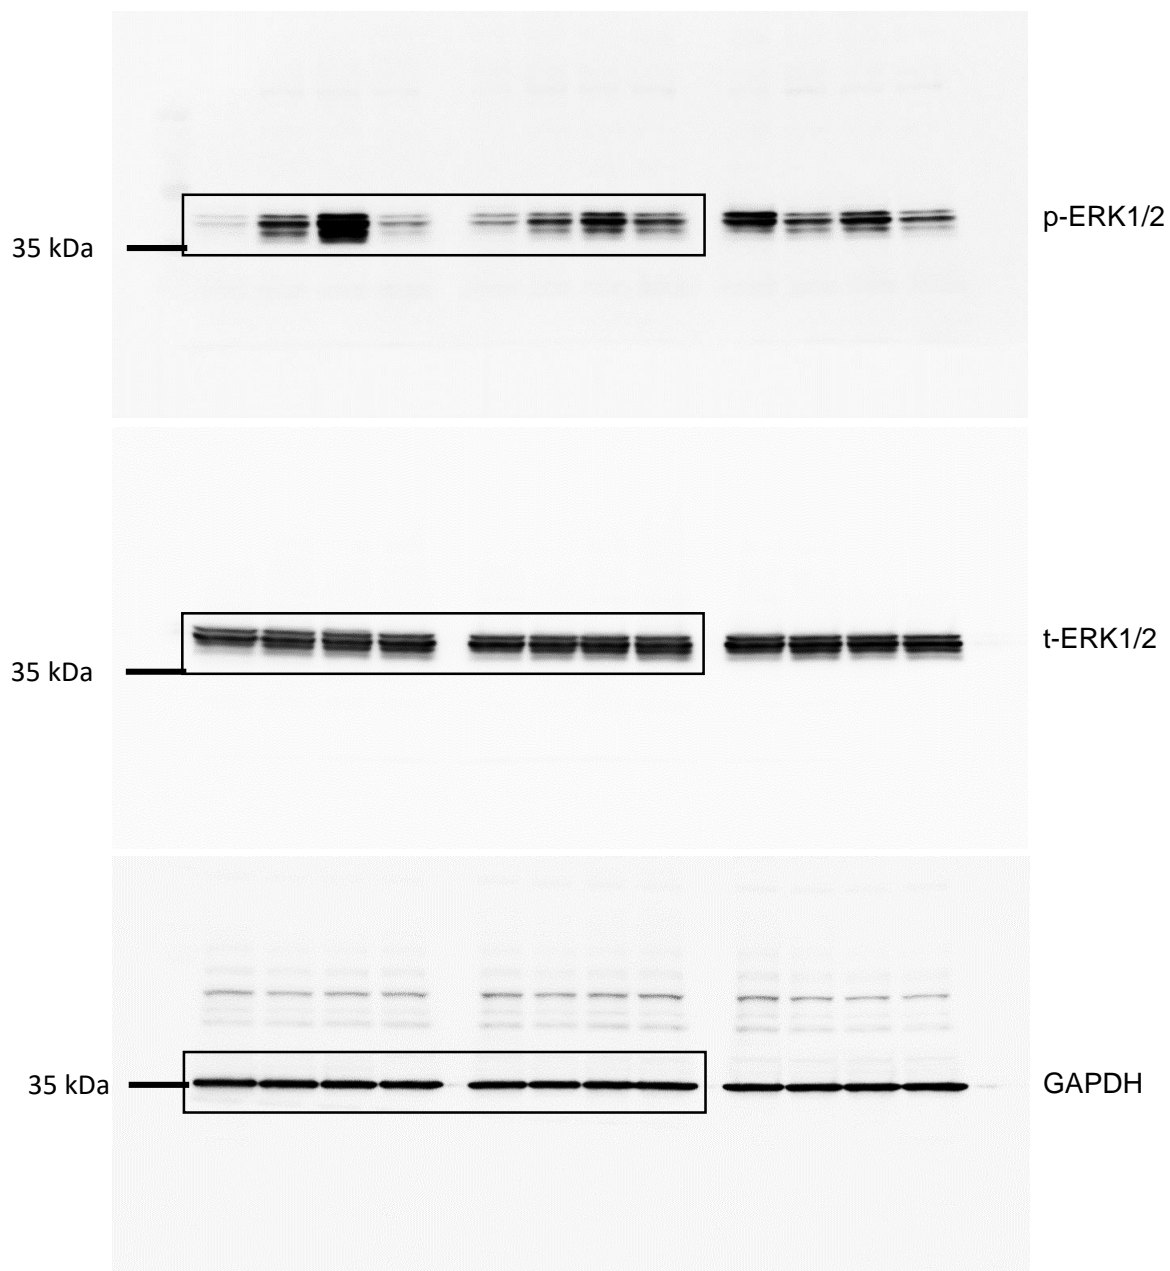

Supplement: 41598_2021_96144_MOESM1_ESM.pdf [file 41598_2021_96144_MOESM1_ESM.pdf]
